1 **Droplet rather than Aerosol Mediated Dispersion is the Primary Mechanism of Bacterial**  
2 **transmission from Contaminated Hand Washing Sink Traps**

3 Shireen Kotay<sup>1</sup>, Rodney M. Donlan<sup>2</sup>, Christine Ganim<sup>2</sup>, Katie Barry<sup>1</sup>, Bryan E. Christensen<sup>2</sup>,  
4 Amy J. Mathers<sup>1,3#</sup>

5 <sup>1</sup> Division of Infectious Diseases and International Health, Department of Medicine, University of  
6 Virginia Health System, Charlottesville, Virginia

7 <sup>2</sup> Division of Healthcare Quality Promotion, Centers for Disease Control and Prevention, Atlanta,  
8 GA, USA

9 <sup>3</sup> Clinical Microbiology, Department of Pathology, University of Virginia Health System,  
10 Charlottesville, Virginia

11

12 **Word count:** Abstract: 149 words (importance 70), Text: 4268 words, References: 47, Figures: 7

13 **Running title:** Characterization of sink microbial particles

14 **#Corresponding Author:** Amy Mathers, M.D. Associate Professor of Medicine, Division of  
15 Infectious Diseases and International Health, P.O. Box 800255, Charlottesville, VA 22908-1361,  
16 Phone: (434) 982-4814, Fax: (434)-982-4047, Email : [ajm5b@virginia.edu](mailto:ajm5b@virginia.edu)

17

18

19

## 20 **ABSTRACT**

21 An alarming rise in hospital outbreaks implicating hand-washing sinks has led to widespread  
22 acknowledgement that sinks are a major reservoir of antibiotic resistant pathogens in patient-care  
23 areas. An earlier study using a GFP-expressing *Escherichia coli* (GFP-*E. coli*) as a model  
24 organism demonstrated dispersal from drain biofilm in contaminated sinks. The present study  
25 further characterizes the dispersal of microorganisms from contaminated sinks. Replicate hand-  
26 washing sinks were inoculated with GFP-*E. coli*, and dispersion was measured using qualitative  
27 (settle plates) and quantitative (air sampling) methods. Dispersal caused by faucet water was  
28 captured with settle plates and air sampling methods when bacteria were present on the drain. In  
29 contrast, no dispersal was captured without or in between faucet events amending earlier theory  
30 that bacteria aerosolize from P-trap and disperse. Numbers of dispersed GFP-*E. coli* diminished  
31 substantially within 30 minutes after faucet usage, suggesting that the organisms were associated  
32 with larger droplet-sized particles that are not suspended in the air for long periods.

33

## 34 **IMPORTANCE**

35 Among the possible environmental reservoirs in a patient care environment, sink drains are  
36 increasingly recognized as potential reservoir of multidrug resistant healthcare-associated  
37 pathogens to hospitalized patients. With increasing antimicrobial resistance limiting therapeutic  
38 options for patients, better understanding of how pathogens disseminate from sink drains is  
39 urgently needed. Once this knowledge gap has decreased, interventions can be engineered to  
40 decrease or eliminate transmission from hospital sink drains to patients. The current study further  
41 defines the mechanisms of transmission for bacteria colonizing sink drains.

42

## 43 INTRODUCTION

44       Recent reports have implicated hand-washing sinks as a primary reservoir of antibiotic  
45 resistant pathogens within patient-care environments(1-27). Many of these reports have been  
46 published since 2016 highlighting the global recognition that biofilms located in and on sinks can  
47 have in disseminating clinically important drug resistant gram-negative bacteria(14-27).  
48 Retrospective and prospective surveillance investigations affirm that hospital sinks provide  
49 habitats for several opportunistic pathogens, raising serious concerns(8, 24, 26, 28). It is not the  
50 mere presence of these drug-resistant pathogens in the hospital wastewater that is of concern, but  
51 the ability of these organisms to colonize biofilms on the luminal surfaces of wastewater  
52 plumbing and thereby withstand routine cleaning practices. While several gammaproteobacteria  
53 detected from the sinks in hospitals have been linked to healthcare-associated infections,  
54 opportunistic pathogens like *Pseudomonas aeruginosa*, *Acinetobacter baumannii* and  
55 *Stenotrophomonas maltophilia* are typically known to be found in water environments(29-31). In  
56 contrast, emerging pathogens such as the carbapenemase-producing *Enterobacteriaceae*, many  
57 having fecal origin, may survive within the biofilm formed on sink surfaces and wastewater  
58 premise plumbing(32, 33). Often by acquiring mobile resistance elements through horizontal  
59 gene transfer, carbapenemase-producing *Enterobacteriaceae* (CPE) infections are especially  
60 threatening because they are more frequent causes of highly antibiotic resistant infections with  
61 reduced treatment options.

62       In outbreak investigations species and strain matching between patient and sink isolates is  
63 often attributed to sink source contamination, however direction (sink to patient versus patient to  
64 sink) and precise mode of transmission remains inconsistent and elusive(29, 30). Even with

65 increased recognition of transmission, a knowledge gap exists with regards to the precise  
66 mechanism of transmission from sink reservoirs to the patient. Using a model of sink  
67 colonization with green fluorescent protein (GFP)-expressing *Escherichia coli* (GFP-*E.coli*), we  
68 recently demonstrated the source and the degree of dispersion from sink wastewater to the  
69 surrounding environment(34). Factors effecting the rate and extent of droplet-mediated  
70 dispersion were investigated, but particle size involved in dispersion was not measured in this  
71 study. Studies that claim aerosols as the primary dispersion mechanism from sinks are based on  
72 rudimentary findings (2, 23, 35, 36) or assumptions drawn based on these unsubstantiated  
73 findings(3, 6, 10, 13, 21, 37). Airborne particles originating from sinks can have varied sizes and  
74 compositions. The World Health Organization and Healthcare Infection Control Practices  
75 Advisory Committee (HICPAC) guidelines use a particle diameter of 5  $\mu\text{m}$  to delineate between  
76 bioaerosol ( $\leq 5 \mu\text{m}$ ) and droplet ( $>5 \mu\text{m}$ ) transmission (38, 39).

77         Aerosol-mediated transmission and droplet-mediated transmission in the healthcare  
78 environment will require conceptually different infection control strategies. Clarity regarding  
79 aerosol versus droplet mediated dispersion in the context of sinks is critical. In the present study,  
80 we aim to further define several outstanding knowledge gaps: i) dispersion mechanism of  
81 bacteria, aerosol sized particles or droplets, from biofilms in handwashing sinks, ii) factors  
82 triggering dispersion from a colonized sink drain and iii) role of biologically active aerosols  
83 spontaneously dispersing from drain or P-trap without a triggering event. GFP-*E. coli* as the  
84 surrogate organism for Enterobacteriaceae was used in this model study to investigate these  
85 questions.

86

87

## 88 MATERIALS AND METHODS

89 **Sink Gallery Operation and Automation.** A dedicated sink gallery at the University of  
90 Virginia and described in an earlier study(34) was used in the present study. Sinks were  
91 operated in automated mode using a microprocessor. The microprocessor activated the faucets  
92 for 30 s each hour via an inline solenoid valve in the hot water supply line (faucet event) and also  
93 turned on a peristaltic pump (Masterflex Pump #HV-77120-42, Cole-Parmer, Vernon Hills, IL)  
94 to dispense 1ml soap (Kleenex Foam Skin Cleaner, Kimberly-Clark Worldwide Inc., Roswell,  
95 GA). A steel tube discharging the soap was held in a clamp attached to the faucet and positioned  
96 directly below the discharge of the faucet water. Water flow rate from the faucet was 8 L/min. In  
97 one experiment, mannequin hands (Dianne Practice Hand, D902, Fromm International, Mt.  
98 Prospect, IL) attached to a metal rack and positioned between the faucet head and sink drain  
99 were used (Figure 1). To facilitate access to the luminal surface of the drain line, sampling ports  
100 were drilled along the length of the tailpiece (between the P-trap and the drain), and the trap arm  
101 (between the P-trap and the common line). These holes were fitted with size 00 silicone stoppers  
102 (Cole-Parmer, Vernon Hills, IL). Temperature and total and free chlorine residual concentrations  
103 of the faucet water i) first catch and ii) after 2 min flushing of faucets were measured at regular  
104 intervals using the DPD method (Hach Model, Hach, Loveland, CO).

105 **Inoculation, Growth and Establishment of GFP-*E.coli* in Sink P-traps.** A single isolated  
106 colony of GFP-*E.coli* (ATCC® 25922GFP™) grown from -80°C stock was inoculated in 5 ml  
107 Tryptic Soy Broth (TSB) containing 100µg/ml ampicillin (ATCC® Medium 2855). The method  
108 of inoculation varied for each experiment. For P-traps a 10ml mid-log phase culture of GFP-  
109 *E.coli* (10<sup>9</sup> CFU/ml) was added into the P-trap water (~150ml) through the lower- most sampling  
110 port on the tailpiece using a 60ml syringe attached to silicone tubing (Cole-Parmer, Vernon Hills,

111 IL). The inoculum was mixed with the P-trap water by repeated withdrawal and injection of the  
112 inoculum, with precautions taken to avoid unintentional inoculation of drain (strainer) or sink  
113 bowl (bowl). For the drain inoculation, a 10ml mid-log phase culture of GFP-*E.coli* ( $10^9$   
114 CFU/ml) was evenly applied on the surface of the drain using a sterile pipet. For establishment  
115 of GFP-*E.coli* P-trap biofilm, a 10 ml mid-log phase culture of GFP-*E.coli* ( $10^9$  CFU/ml) was  
116 added into an unused P-trap and following inoculation, 25ml TSB and 25ml (x2) 0.85% saline  
117 was added on a daily basis through the drain for 7 days to facilitate biofilm growth on the  
118 luminal surface of the drain line without additional water every hour. Seven days later, P-trap  
119 water and swab samples from the inner surface of the drain, tailpiece, and the P-trap were plated  
120 on Tryptic soy agar containing 100 $\mu$ g/ml ampicillin (TSA). TSA plates were incubated overnight  
121 at 37°C and colony-forming units (CFUs) fluorescing under UV light were enumerated. All  
122 preparatory culturing of GFP-*E.coli* took place in a separate room from the sink gallery to avoid  
123 unintentional contamination.

124 **Sampling and Enumeration of GFP-*E.coli*.** To monitor the growth of GFP-*E.coli* within the  
125 plumbing, sterile cotton swabs (Covidien™, Mansfield, MA) presoaked in 0.85% sterile saline  
126 were inserted through sampling ports and biofilm samples were collected by turning the swab in  
127 a circular motion on the inner surface ( $\sim 20$  cm<sup>2</sup>). Sample swabs were pulse-vortexed in 3ml  
128 saline and serial dilutions were plated on TSA. The entire surface area of the drain, faucet  
129 aerator, and sink bowl surfaces were sampled using environmental sponge wipes (3M Sponge-  
130 stick with neutralizing buffer, 3M, St. Paul, MN) using overlapping and multidirectional  
131 motions. The sponge-wipes were expressed in 90 ml of Phosphate Buffered Saline containing  
132 Tween 80 (0.02%) (PBST) using a Stomacher (400 Circulator (Seward Ltd., UK). The eluate  
133 was concentrated by centrifugation and plate counts were performed on TSA and R2A agar

134 (Becton Dickinson and Company, Franklin Lakes, NJ). TSA plates were incubated at 35°C for  
135 48hr and fluorescent CFUs were enumerated; R2A plates were incubated at 25°C for 7d and  
136 CFUs were counted.

137 **Experimental Approach for Dispersion Studies.** Each dispersion experiment comprised a 30 s  
138 faucet event repeated three times at 60 min intervals (Fig. 2). Each experiment also comprised a  
139 control (without faucet events) followed by a test (with faucet events). Three sinks were tested  
140 concurrently but staggered by a few minutes, to account for the variability in dispersion driven  
141 by faucet water flowrate, air flow dynamics in the room, contact angle and wastewater drainage /  
142 water backup rate.

143 **Sampling Droplet Dispersion.** TSA settle plates were used to capture the droplet dispersion.  
144 Numbered TSA plates were laid out radially around the sink bowl. A fixed layout and number of  
145 settle plates around the sinks was used for each dispersal experiment (Fig. 3). The counter space  
146 of each sink was thoroughly disinfected with Caviwipes-1 (Metrex Research, LLC, Orange, CA)  
147 prior to each experiment. TSA plates were then positioned on the sink counter surrounding the  
148 sink bowl. Additional plates were attached to the faucets, plexiglass partitions, and faucet  
149 handles using adhesive tape. Plates were not placed in the sink bowl. TSA plates were also  
150 placed >3 m away from the sink as negative controls. Lids of the TSA plates were removed only  
151 for the duration of the dispersal experiment. Dispersion per defined area (CFU/cm<sup>2</sup>) for settle  
152 plates was determined by dividing the CFU counts in the TSA plate by the surface area of the  
153 plate.

154 **Air Sampling and Particle Counts.** Each dispersion experiment comprised the collection of air  
155 samples at five separate time points: time t=0 (first faucet event), t=30 minutes after the first

156 faucet event, t=60 minutes (second faucet event), t=90 minutes, and t=120 minutes (third faucet  
157 event) (Fig. 2). Individual sink sampling was staggered by a few minutes to provide time for air  
158 sampler installation and sampling of each sink. A control experiment period, in which faucets  
159 were not activated for the entire 120 minutes was also performed for each sink. Three air  
160 sampling methods were tested: impaction, impingement, and filtration. For the impaction  
161 method, two SAS90 air samplers (Bioscience International, Rockville, MD) containing one TSA  
162 plate and one R2A plate each were positioned 12 inches from the sink bowl and set for a 300L  
163 sample (at 90L/min for 200 seconds) (Fig. 2a). TSA and R2A plates from each air sampling  
164 event were incubated as described earlier. A gel filtration device (MD8 Portable Air Sampler-  
165 Sartorius AG Goettingen, Germany) fitted with disposable gelatin filters (Sartorius AG  
166 Goettingen, Germany) was positioned 12 inches from the sink bowl and set for a 300L sample  
167 (at 100L/min for 180 seconds) (Fig. 2c). Gelatin filters were carefully overlaid on TSA plates,  
168 which were as already described. Liquid impingers (Ace Glass Inc. Vineland, NJ) were  
169 autoclaved and filled with 20ml sterile Phosphate Buffered Saline (PBS) prior to each  
170 experiment. Each was connected via a flowmeter (Cole-Parmer, Vernon Hills, IL) and vacuum  
171 pump (Cole-Parmer, Vernon Hills, IL). The impinger was positioned 12 inches from the sink  
172 bowl (set at 6L/min for 50min) to collect a 300L air sample (Fig 2b). In a biological safety  
173 cabinet, the liquid from the impinger was transferred to a sterile tube, vortexed, filtered through  
174 0.22 $\mu$ m membrane filters (Pall Laboratories, Port Washington, NY), and 5 ml duplicate samples  
175 were plated on TSA and R2A plates. Fluorescent CFUs were enumerated after TSA plates were  
176 incubated at 35°C for 48 hours and counted. R2A plates were incubated for 7 days at 25°C and  
177 counted. Plates from air impaction samples and samples collected from liquid impingement were  
178 shipped via overnight courier to CDC laboratories for processing and counting. Gel filtration



179 plates were processed and counted at University of Virginia. Paired with air sampling particles in  
180 size range 0.3, 0.5, 0.7, 1.0, 2.0 and 5.0  $\mu\text{m}$  were measured using particle counter (GT-526, Met  
181 One Instruments, Inc. Grants Pass, OR) placed 12 inches from the sink bowl (Fig 2.). With a  
182 runtime of 660 seconds each, 3 successive runs of particle counter were performed, first run  
183 coinciding with  $t=0$ . Particle counter also recorded relative humidity and air temperature.

184 **Verification of GFP-*E. coli*.** Fluorescent colonies on TSA-amp plates were counted under a  
185 long-wavelength UV light source. To verify that fluorescent colonies were GFP-*E.coli*, two  
186 fluorescent colonies from each sample were randomly selected and first screened on MacConkey  
187 II agar (BD, Franklin Lakes, NJ). The MacConkey II plates were incubated at 35°C for 24 hours,  
188 and lactose fermenters were isolated on Trypticase Soy Agar with 5% Sheep Blood (TSA II)  
189 (BD, Franklin Lakes, NJ) and incubated under the same conditions. Once colonies were isolated,  
190 they were identified using matrix assisted laser desorption ionization-time of flight mass  
191 spectrometry (MALDI-TOF MS) (Bruker, Billerica, MA), or using the Vitek 2 system  
192 (bioMérieux Durham, NC).

193 **GFP-*E.coli* Detection in Sink Plumbing and faucet water.** Prior to each experiment, 500 mL  
194 of first-catch faucet water and a 500 mL sample collected after two minutes of flushing were  
195 collected in sterile bottles containing sodium thiosulfate (0.18 g/l) for dechlorination. Samples  
196 were plated on TSA and incubated at 35°C for 48 hours to test for GFP-*E.coli* in the faucet water  
197 supplied to each sink and to ensure cross contamination of GFP-*E.coli* had not occurred. First-  
198 catch and two-minute flush samples were diluted and plated on R2A, which were incubated at  
199 25°C for 7 days and counted. After the experiment was completed, samples were collected and  
200 processed to detect GFP-*E.coli* in the sink plumbing. The P-trap water was collected, and  
201 processed by vortexing and filtration, and plated in duplicate on TSA and R2A media as already

202 described. The sink P-trap and tailpiece were removed from the sink lab units, filled with faucet  
203 water, plugged, and shipped by overnight courier to CDC for analysis. Swab sampling from the  
204 tailpipe and P-trap, and sponge wipes were processed as already described to recover and  
205 quantify biofilm organisms. Samples were plated on TSA and R2A media, and counted, as  
206 described.

207

## 208 **RESULTS**

209 Free and total chlorine concentrations in the faucet water were consistent across the experiments  
210 (Table 1). So were the water and air temperatures (Table 2). In comparison, the relative humidity  
211 recorded across the experiments varied, with highest recorded in case of P-trap inoculation  
212 experiments (Table 2).

213 **Dispersion immediately following P-trap inoculation.** No GFP-*E. coli* dispersion was detected  
214 on settle plates immediately following inoculation of P-traps with  $10^{10}$  CFU GFP-*E. coli* (Fig.  
215 4a). No dispersion was detected using impaction, impingement, or filtration air sampling  
216 methods (Fig. 5). Further, no GFP-*E.coli* were recorded in the P-trap water, P-trap, tailpiece or  
217 sink bowl surface samples collected at the end of dispersion experiment.

218 **Dispersion immediately following Drain inoculation.** When sink drains were inoculated with  
219  $10^{10}$  CFU GFP-*E. coli*, dispersion was detected on settle plates and by impaction and filtration.  
220 Dispersion detected by settle plates across the three sinks ranged from 35-107 CFU/plate. GFP-  
221 *E.coli* levels were higher on the counter space surrounding the sink bowl compared to lower  
222 counts near the faucets (Fig 4b). Dispersion was not detected on side-splatter shields. With the  
223 exception of the detection of 1 CFU/m<sup>3</sup> at t=60 min using the impaction, dispersion of GFP-*E.*

224 *coli* was detected only at the first faucet event ( $t=0$  min) using both impaction and filtration  
225 methods (Fig 5). Average dispersion captured at the first faucet event ( $t=0$ min) was 77 and 83  
226 CFU/m<sup>3</sup> using impaction and filtration methods respectively. GFP-*E. coli* was not detected at  
227 any time point using liquid impingement.

228 **Dispersion following growth for 7 days in an amended P-trap biofilm.** Allowing colonization  
229 of GFP-*E. coli* in drainlines between strainer and P-trap with nutrient exposure over time,  
230 dispersion was detected on settle plates (Fig. 4c), with counts ranging from 49-107 CFU/plate.  
231 The counter space surrounding the sink bowl received the largest amount of droplet dispersion,  
232 followed by faucet, faucet handle surfaces and splatter shields. GFP-*E. coli* levels were highest at  
233 the first faucet event ( $t=0$  min) and not detectable afterwards, with the exception of a 2 CFU/m<sup>3</sup>  
234 count at 60 min using air impaction and 1 CFU/m<sup>3</sup> count at 90 min filtration similar to what was  
235 observed for drain inoculation (Fig. 5). Dispersion captured at the first faucet event ( $t=0$  min)  
236 was 138 and 29 CFU/m<sup>3</sup> using impaction and filtration methods, respectively. GFP-*E.coli* was  
237 not detected using liquid impingement. GFP-*E.coli* was detected on the sink bowl, drain grate,  
238 tailpiece, P-trap, and P-trap water at the completion of this experiment (data not shown).

239 **Dispersion without faucet events (control experiments).** Without a faucet event, GFP-*E. coli*  
240 was not detected on settle plates, or by impaction, impingement, or filtration air sampling  
241 methods in any experiment. Without a faucet event fungal and non-fluorescent CFUs were  
242 occasionally recorded on settle plates, subsequently identified as *Staphylococcus sp.*, non-  
243 hemolytic Streptococci, *Paenibacillus sp.*, yeast and small gram positive rods.

244 **Total viable heterotrophic organisms in laboratory air.** No GFP-*E. coli* was detected in the  
245 faucet water at any time during experiments. Air samples were collected by impaction on R2A  
246 medium with and without faucet events, in order to quantify total heterotrophic organisms in the

247 air space in proximity to the sink during each experiment. Across the experiments the  
248 heterotrophic organisms in the air ranged from 4-578 and 2-69 CFU/m<sup>3</sup> with (test) and without  
249 (control) faucet events, respectively (Fig. 6). Dispersion captured at the first faucet event  
250 (t=0min) when the faucets were turned on (test) was 1 log<sub>10</sub> higher than the same recorded in  
251 case of control experiment (without faucet event). Heterotrophic organisms captured from the air  
252 steadily declined along the time points 0, 30, 60, 90 and 120 min with and without faucet events.  
253 Particle concentrations in the air with and without faucet events were found to be consistent  
254 during the day of the experiment. However, when compared across the experiments, no  
255 correlation could be established (Supplemental Figure S1).

#### 256 **Dispersion in the Presence of Mannequin Hands**

257 When mannequin hands, which created a barrier for water flow onto the drain, were positioned  
258 under the faucet and the sink drain was inoculated with ~1E+10 CFUs GFP-*E.coli*, 10-fold lower  
259 dispersion was captured on settle plates. No dispersion in air sampling using impaction or  
260 filtration methods was observed. Dispersion pattern and load on settle plates varied considerably  
261 across the three sinks and experiments with the mannequin hands in place.

262

#### 263 **DISCUSSION**

264 The objective of the present study was to characterize the mechanism of bacterial dispersion  
265 from handwashing sinks, using a GFP plasmid-containing *E. coli* strain as a surrogate for  
266 multidrug resistant Enterobacteriaceae. Very few studies have investigated the dispersion from  
267 sinks using methods to sample aerosol-associated microorganisms(23, 36, 40, 41); however,  
268 several studies have drawn subjective interpretations about aerosol-mediated transmission from

269 contaminated sinks(3, 6, 10, 13, 21, 37). Doring et al. used an impaction method to examine *P.*  
270 *aeruginosa* dispersion from the sink bowl surface during faucet use. *P. aeruginosa* was detected  
271 15 cm from the sink drain when counts in the sink drains exceeded  $10^5$  CFU/ml (41). Kramer et  
272 al. detected 439 CFU/m<sup>3</sup> *P. aeruginosa* in the air sampled 10cm above the sink drain with  $10^5$   
273 CFU/ml bacteria in the ‘sink fluid’ (P-trap water)(40). In these studies, dispersion was not  
274 measured without faucet usage (control samples). De Geyter et al. used an MAS-100 air sampler  
275 to measure CRE dispersal from contaminated sinks with and without faucet usage. Several  
276 species in the family Enterobacteriaceae were detected during faucet usage but results for control  
277 samples (without faucet usage) were not provided(23). Fusch et al. in contrast sampled air  
278 around sinks with and without faucet event (control) and did not detect *P. aeruginosa* in air  
279 samples collected without running water(36). We had previously provided a quantitative  
280 assessment of dispersal as a function of faucet usage and reported GFP-*E. coli* could be dispersed  
281 up to 30 inches beyond the sink drain during faucet usage(34). However, dispersion was  
282 assessed using a gravity method, and bioaerosol production was not evaluated.

283 The air sampling methods chosen and tested in the present study were three of the most widely  
284 used methods previously reported(23, 35, 36, 40, 42, 43) and were selected to assess bioaerosol  
285 production during sink usage. In the present study, GFP-*E. coli* dispersion was detected during a  
286 faucet event but was not detected in the absence of faucet events using either settle plates or  
287 impaction and filtration air sampling methods. This finding corroborates previous studies (2, 21,  
288 34, 36). It also implies that shear forces of the faucet water flowing onto the sink drain and/or  
289 bowl surfaces results in dispersion of bacteria. Detection of dispersed GFP-*E. coli* during a  
290 faucet event and non-detection at subsequent time points (after 30 minutes) suggested that  
291 dispersed cells were associated with larger heavier droplets that would quickly settle onto

292 surfaces due to gravity rather than aerosol sized particles which remain in the air(44). Dispersion  
293 of GFP-*E. coli* from sinks does not appear to be associated with the production of bioaerosols,  
294 that is, particles smaller than 5  $\mu\text{m}$  (35, 40, 45, 46). Studies that measured air sampling lacked  
295 the resolution between aerosols and droplets(35, 40, 41). Air was sampled significantly closer  
296 (~4 inch) to the sink drain or impact point of faucet water on the sink and therefore, might have  
297 picked droplets rather than aerosols.

298 A consistent result from this work which is worth reemphasizing is the finding that for dispersion  
299 to occur the presence of bacteria on drain and/or bowl surface is necessary(34). When GFP-*E.*  
300 *coli* was inoculated into a new P-trap, dispersion was not detected using settle plates or air  
301 sampling methods. This underscores the fact that as long as the sink drain and bowl remain free  
302 of the target organisms (e.g., CPE or other antibiotic resistant Gammaproteobacteria), dispersion  
303 can be controlled. However, under favorable conditions bacteria can grow or mobilize from the  
304 P-trap into the drain piping (tailpiece) and colonize the sink drain surfaces, with the potential for  
305 a dispersion event to occur. This further underlines the importance of sanitary hygiene practices,  
306 strategic surveillance paired with hand washing only use of hand-washing sinks in the patient  
307 care environment to reduce the risk of hand-washing sink contamination by the multi-drug-  
308 resistant microorganisms that can colonize ICU patients(8). This also emphasizes the necessity to  
309 implement stricter measures to prohibit disposal of nutrients, body fluids and anything into the  
310 sinks that could be a nutrient source for maintenance of microorganism biofilms in drains(23).  
311 Dispersion from a contaminated sink reservoir can result in transmission to patients either  
312 directly or indirectly mediated through numerous contact surfaces. Herruzo and colleagues  
313 demonstrated the potential for microbial transfer from contaminated hands, which continued to  
314 disperse microorganisms after more than 10 successive contacts with surfaces (25).

315 The droplet dispersion load observed on settle plates was similar and consistent with our  
316 previous work(34). Total dispersion measured in corresponding experiments in the previous  
317 study was higher, which may be attributed to one or more of the following factors: i) fewer settle  
318 plates were used in the present study (22 vs 90), ii) a higher water flow rate was used in the  
319 present study (8 vs 1.8-3.0 L/min) and iii) air sampling methods performed in conjunction with  
320 the settle plate method may have captured a portion of the dispersed droplets. Settle plates were  
321 found to be a reliable method to assess the large-droplet dispersion from sinks. In this study 22  
322 settle plates (=11.24 m<sup>2</sup>) were used which accounted for a defined surface area and locations on  
323 the sink counter. Dispersion could have been higher in locations of the sink counter other than  
324 those chosen in the present study, and the dispersion load recorded in this study may not be the  
325 absolute value. Of the three methods investigated for air sampling, impaction and filtration were  
326 found to be reliable and consistent. In the same amount of air sampled using impaction and  
327 filtration, comparable counts were recorded; however, air sampled using the impinger method  
328 was unable to capture the dispersion of GFP-*E.coli* under similar testing conditions.

329 Mannequin hands functioned as obstruction to direct impact of faucet water on the sink drain,  
330 and therefore no dispersion was detected. This rationale behind testing mannequin hands was to  
331 simulate hand washing, but in reality the water would be flowing before, after and during a hand  
332 washing event. In other words, an actual handwashing event is more dynamic than static  
333 mannequin hands and there is likely direct impact of water on the sink drain at least for brief  
334 periods when the water is running. There is also the scenario where the sinks and faucets may be  
335 used outside of hand washing (e.g. dumping liquid wastes)(5, 8, 23). This finding we think  
336 further defines and supports another important dynamic that may minimize dispersion in  
337 healthcare settings (i.e., avoid faucet water flow directly onto drains to minimize dispersion). All

338 of these findings must be taken in the context of an experimental water stream which directly hits  
339 the drain which is outside FGI guidance but thought to be frequently found in health care sink  
340 design.

341 This study has several limitations. First, the dispersion experiments were not performed in a  
342 controlled environment. Each dispersion experiment lasted at least 12h, therefore it was not  
343 possible to maintain precisely the same conditions with regards to air flow velocity, air  
344 temperature, relative humidity, and bacterial and/or fungal burden in the laboratory space  
345 harboring the sinks. These parameters may have direct or indirect influence on the dispersion  
346 pattern and load recorded across experiments(47). To address this issue, we monitored the  
347 heterotrophic plate counts, relative humidity and particle concentration in the air. Particle counts  
348 recorded in the absence of faucet event (control) were higher or equal to that in the presence of  
349 faucet event (test). This observation implies that particle concentrations in the air were driven by  
350 relative humidity and/or temperature of the air. This trend was observed in all the experimental  
351 methods (Drain, P-trap inoculation and Drain colonization) (Supplemental Figure S1). In other  
352 words, particle counts were largely consistent across the day for a given experiment (control  
353 preceding test). Further particle counter used in the study could not resolve or measure particles  
354  $>5\mu\text{m}$ , which defined droplet particles. Another limitation was that air samples were collected at  
355 only one location relative to the sink bowl, so it is not possible for this data set to define a  
356 “splash zone” pattern without additional measurements collected from various positions and  
357 distance from the source of dispersed organisms.

358 We have provided data to support the position that microorganisms will disperse from  
359 contaminated sink bowl and drain surfaces primarily as large droplets that are generated during  
360 faucet usage. These droplet-associated organisms remain viable with the potential to contaminate



361 surfaces surrounding the sink bowl. However, it does not appear that dispersion results in the  
362 production of bioaerosols with sustained dispersion characteristics into the patient's room space  
363 with this simulated sink design and study.

#### 364 **ACKNOWLEDGEMENTS**

365 This research was performed under a Research Collaboration Agreement between University of  
366 Virginia and the CDC. A. Mathers was supported in part by an IPA agreement between the CDC  
367 and the University of Virginia School of Medicine (15IPA1508992). The findings and  
368 conclusions in this presentation are those of the author(s) and do not necessarily represent the  
369 views of the Centers for Disease Control and Prevention. Thank you to Alexander Kallen for  
370 helpful discussions, James Matheson, Maria Burgos-Garay, and Amanda Lyons for assistance  
371 with sample processing and Will Guilford for design of the sink laboratory and automation.

372

373

374

375

376

377

378

379

380

381

382

383 **Table 1.** Total and Free Concentrations and temperature in the Faucet water

|                   | Initial (First Catch) | Final (After 2min) |
|-------------------|-----------------------|--------------------|
| Total Chlorine    | 0.77 ±0.26 mg/L       | 0.63 ±0.07 mg/L    |
| Free Chlorine     | 0.62 ±0.25 mg/L       | 0.54 ±0.13 mg/L    |
| Water Temperature | 22.53 ±1.87°C         | 36.69 ±2.17°C      |

384

385 Mean and standard deviation of total and free chlorine residual and water temperature, measured at  
386 different time points and from water collected from faucets supplying different sinks over the course of  
387 this study.

388

389 **Table 2.** Air temperature and relative humidity recorded across experiments.

390

|                             | Air Temperature (°C) | Relative Humidity |
|-----------------------------|----------------------|-------------------|
| Drain Inoculation           | 19.8                 | 31.4              |
| P-trap Inoculation          | 19.5                 | 54.4              |
| Drain + P-trap Colonization | 20.0                 | 44.7              |
| Control experiments         | 19.7                 | 46.5              |

391

392

393

394

395  
396  
397  
398  
399  
400  
401  
402  
403  
404  
405  
406  
407  
408  
409  
410  
411  
412  
413  
414  
415  
416  
417

## FIGURE LEGENDS

1. Test sink, showing mannequin hands positioned directly below faucet (A), and a peristaltic pump on the left to deliver hand-soap (B), via steel tube attached to the faucet (C).
2. Experimental set-up used for different air sampling methods: a) Impaction, b) Impinger, and c) Gel Filtration. Air samples were collected at the initial faucet event (0 min) and every 30 minutes thereafter. Faucet events (faucet activation) occurred at 0, 60, and 120 minutes under test conditions. Faucets were not activated in control experiments.
3. Graphical representation depicting the layout of the settle plates positioned around the sink used to capture droplet dispersion.
4. Heat map representation of GFP-*E.coli* dispersion captured on TSA settle plates following (a) P-trap, (b) sink drain inoculation and (c) drainline colonization.
5. GFP-*E. coli* as measured by impaction [SAS90], and gel filtration [MD8] across D-Drain inoculation, D7-Drainline colonization and P-P-trap inoculation methods.
6. Heterotrophic Plate Counts as measured by impaction air sampling a) without faucet event (Control) and b) with faucet events (Test).

Supplemental Figure S1: Particle Counts (measured with MetOne GT-526) across Control (without faucet) and Test (with faucet) experiments of D-Drain inoculation, D7-Drainline colonization and P-P-trap inoculation methods.

418

419

420

421       **REFERENCES**

- 422   1.    Brooke J. 2008. Pathogenic bacteria in sink exit drains. *Journal of Hospital Infection*  
423       70:198-199.
- 424   2.    Hota S, Hirji Z, Stockton K, Lemieux C, Dedier H, Wolfaardt G, Gardam M. 2009.  
425       Outbreak of Multidrug-Resistant *Pseudomonas aeruginosa* Colonization and Infection  
426       Secondary to Imperfect Intensive Care Unit Room Design. *Infect Control Hosp*  
427       Epidemiol 30:25-33.
- 428   3.    La Forgia C, Franke J, Hacek D, Thomson R, Robicsek A, Peterson L. 2010.  
429       Management of a multidrug-resistant *Acinetobacter baumannii* outbreak in an intensive  
430       care unit using novel environmental disinfection: A 38-month report. *American Journal*  
431       of Infection Control 38:259-263.
- 432   4.    Breathnach AS, Cubbon MD, Karunaharan RN, Pope CF, Planche TD. 2012. Multidrug-  
433       resistant *Pseudomonas aeruginosa* outbreaks in two hospitals: association with  
434       contaminated hospital waste-water systems. *J Hosp Infect* 82:19-24.
- 435   5.    Lowe C, Willey B, O'Shaughnessy A, Lee W, Lum M, Pike K, Larocque C, Dedier H,  
436       Dales L, Moore C, McGeer A. 2012. Outbreak of extended-spectrum beta-lactamase-  
437       producing *Klebsiella oxytoca* infections associated with contaminated handwashing  
438       sinks(1). *Emerg Infect Dis* 18:1242-7.

- 439 6. Starlander G, Melhus A. 2012. Minor outbreak of extended-spectrum beta-lactamase-  
440 producing *Klebsiella pneumoniae* in an intensive care unit due to a contaminated sink. *J*  
441 *Hosp Infect* 82:122-4.
- 442 7. Kotsanas D, Wijesooriya WR, Korman TM, Gillespie EE, Wright L, Snook K, Williams  
443 N, Bell JM, Li HY, Stuart RL. 2013. "Down the drain": carbapenem-resistant bacteria in  
444 intensive care unit patients and handwashing sinks. *Med J Aust* 198:267-9.
- 445 8. Roux D, Aubier B, Cochard H, Quentin R, van der Mee-Marquet N. 2013. Contaminated  
446 sinks in intensive care units: an underestimated source of extended-spectrum beta-  
447 lactamase-producing Enterobacteriaceae in the patient environment. *J Hosp Infect*  
448 85:106-11.
- 449 9. Tofteland S, Naseer U, Lislevand J, Sundsfjord A, Samuelsen O. 2013. A Long-Term  
450 Low-Frequency Hospital Outbreak of KPC-Producing *Klebsiella pneumoniae* Involving  
451 Intergenous Plasmid Diffusion and a Persisting Environmental Reservoir. *Plos One* 8.
- 452 10. Vergara-Lopez S, Dominguez M, Conejo M, Pascual A, Rodriguez-Bano J. 2013.  
453 Wastewater drainage system as an occult reservoir in a protracted clonal outbreak due to  
454 metallo-beta-lactamase-producing *Klebsiella oxytoca*. *Clin Microbiol Infect* 19:E490-  
455 E498.
- 456 11. Knoester M, de Boer M, Maarleveld J, Claas E, Bernards A, Jonge E, van Dissel J,  
457 Veldkamp K. 2014. An integrated approach to control a prolonged outbreak of multidrug-  
458 resistant *Pseudomonas aeruginosa* in an intensive care unit. *Clin Microbiol Infect*  
459 20:O207-O215.

- 460 12. Wolf I, Bergervoet P, Sebens F, van den Oever H, Savelkoul P, van der Zwet W. 2014.  
461 The sink as a correctable source of extended-spectrum beta-lactamase contamination for  
462 patients in the intensive care unit. *J Hosp Infect* 87:126-130.
- 463 13. Leitner E, Zarfel G, Luxner J, Herzog K, Pekard-Amenitsch S, Hoenigl M, Valentin T,  
464 Feierl G, Grisold AJ, Hogenauer C, Sill H, Krause R, Zollner-Schwetz I. 2015.  
465 Contaminated handwashing sinks as the source of a clonal outbreak of KPC-2-producing  
466 *Klebsiella oxytoca* on a hematology ward. *Antimicrob Agents Chemother* 59:714-6.
- 467 14. Ambrogi V, Cavalie L, Manton B, Ghiglia MJ, Cointault O, Dubois D, Prere MF,  
468 Levitzki N, Kamar N, Malavaud S. 2016. Transmission of metallo-beta-lactamase-  
469 producing *Pseudomonas aeruginosa* in a nephrology-transplant intensive care unit with  
470 potential link to the environment. *J Hosp Infect* 92:27-29.
- 471 15. Chapuis A, Amoureux L, Bador J, Gavalas A, Siebor E, Chretien ML, Caillot D, Janin  
472 M, de Curraize C, Neuwirth C. 2016. Outbreak of Extended-Spectrum Beta-Lactamase  
473 Producing *Enterobacter cloacae* with High MICs of Quaternary Ammonium Compounds  
474 in a Hematology Ward Associated with Contaminated Sinks. *Front Microbiol* 7:1070.
- 475 16. Clarivet B, Grau D, Jumas-Bilak E, Jean-Pierre H, Pantel A, Parer S, Lotthe A. 2016.  
476 Persisting transmission of carbapenemase-producing *Klebsiella pneumoniae* due to an  
477 environmental reservoir in a university hospital, France, 2012 to 2014. *Euro Surveill* 21.
- 478 17. Stjarne Aspelund A, Sjostrom K, Olsson Liljequist B, Morgelin M, Melander E, Pahlman  
479 LI. 2016. Acetic acid as a decontamination method for sink drains in a nosocomial  
480 outbreak of metallo-beta-lactamase-producing *Pseudomonas aeruginosa*. *J Hosp Infect*  
481 94:13–20.

- 482 18. Swan JS, Deasy EC, Boyle MA, Russell RJ, O'Donnell MJ, Coleman DC. 2016.  
483 Elimination of biofilm and microbial contamination reservoirs in hospital washbasin U-  
484 bends by automated cleaning and disinfection with electrochemically activated solutions.  
485 *Journal of Hospital Infection* 94:169-174.
- 486 19. Zhou Z, Hu B, Gao X, Bao R, Chen M, Li H. 2016. Sources of sporadic *Pseudomonas*  
487 *aeruginosa* colonizations/infections in surgical ICUs: Association with contaminated sink  
488 trap. *J Infect Chemother* 22:450-5.
- 489 20. Amoureux L, Riedweg K, Chapuis A, Bador J, Siebor E, Pechinot A, Chretien M, de  
490 Curraize C, Neuwirth C. 2017. Nosocomial Infections with IMP-19-Producing  
491 *Pseudomonas aeruginosa* Linked to Contaminated Sinks, France. *Emerging Infectious*  
492 *Diseases* 23:304-307.
- 493 21. Baranovsky S, Jumas-Bilak E, Lotthe A, Marchandin H, Parer S, Hicheri Y, Romano-  
494 Bertrand S. 2017. Tracking the spread routes of opportunistic premise plumbing  
495 pathogens in a haematology unit with water points-of-use protected by antimicrobial  
496 filters. *J Hosp Infect*.
- 497 22. Bousquet A, van der Mee-Marquet N, Dubost C, Bigaillon C, Larréché S, Bugier S,  
498 Surcouf C, Mérat S, Blanchard H, Mérens A. 2017. Outbreak of CTX-M-15-producing  
499 *Enterobacter cloacae* associated with therapeutic beds and syphons in an intensive care  
500 unit. *American Journal of Infection Control*.
- 501 23. De Geyter D, Blommaert L, Verbraeken N, Sevenois M, Huyghens L, Martini H, Covens  
502 L, Pierard D, Wybo I. 2017. The sink as a potential source of transmission of  
503 carbapenemase-producing Enterobacteriaceae in the intensive care unit. *Antimicrobial*  
504 *Resistance and Infection Control* 6.

- 505 24. Lalancette C, Charron D, Laferriere C, Dolce P, Deziel E, Prevost M, Bedard E. 2017.  
506 Hospital Drains as Reservoirs of *Pseudomonas aeruginosa*: Multiple-Locus Variable-  
507 Number of Tandem Repeats Analysis Genotypes Recovered from Faucets, Sink Surfaces  
508 and Patients. *Pathogens* 6.
- 509 25. Herruzo R, Ruiz G, Vizcaino MJ, Rivas L, Perez-Blanco V, Sanchez M. 2017. Microbial  
510 competition in environmental nosocomial reservoirs and diffusion capacity of OXA48-  
511 *Klebsiella pneumoniae*: potential impact on patients and possible control methods. *J Prev*  
512 *Med Hyg* 58:E34-E41.
- 513 26. Varin A, Valot B, Cholley P, Morel C, Thouverez M, Hocquet D, Bertrand X. 2017. High  
514 prevalence and moderate diversity of *Pseudomonas aeruginosa* in the U-bends of high-  
515 risk units in hospital. *International Journal of Hygiene and Environmental Health*  
516 220:880-885.
- 517 27. Deasy EC, Moloney EM, Boyle MA, Swan JS, Geoghegan DA, Brennan GI, Fleming  
518 TE, O'Donnell MJ, Coleman DC. 2018. Minimizing microbial contamination risk  
519 simultaneously from multiple hospital washbasins by automated cleaning and  
520 disinfection of U-bends with electrochemically activated solutions. *Journal of Hospital*  
521 *Infection*.
- 522 28. Dewi R, Tarini A, Sukrama D. 2013. Phenotypic detection of carbapenemase-  
523 producing gram-negative bacteria in hospital environment abstr ASID Gram  
524 Negative Superbugs Meeting Queensland, Australia,
- 525 29. Loveday H, Wilson J, Kerr K, Pitchers R, Walker J, Browne J. 2014. Association  
526 between healthcare water systems and *Pseudomonas aeruginosa* infections: a rapid  
527 systematic review. *Journal of Hospital Infection* 86:7-15.



- 528 30. Bloomfield S, Exner M, Flemming HC, Goroncy-Bernes P, Hartemann P, Heeg P,  
529 Ilschner C, Krämer I, Merkens W, Oltmanns P, Rotter M, Rutala WA, Sonntag HG,  
530 Trautmann M. 2015. Lesser-known or hidden reservoirs of infection and implications for  
531 adequate prevention strategies: Where to look and what to look for. *GMS Hyg Infect*  
532 *Control* 10:Doc04.
- 533 31. Guyot A, Turton JF, Garner D. 2013. Outbreak of *Stenotrophomonas maltophilia* on an  
534 intensive care unit. *J Hosp Infect* 85:303-7.
- 535 32. Palmore TN, Henderson DK. 2013. Managing transmission of carbapenem-resistant  
536 enterobacteriaceae in healthcare settings: a view from the trenches. *Clin Infect Dis*  
537 *57*:1593-9.
- 538 33. Gordon A, Mathers A, Cheong E, Gottlieb T, Kotay S, Walker A, Peto T, Crook D,  
539 Stoesser N. 2017. The Hospital Water Environment as a Reservoir for Carbapenem-  
540 Resistant Organisms Causing Hospital-Acquired Infections-A Systematic Review of the  
541 Literature. *Clinical Infectious Diseases* 64:1435-1444.
- 542 34. Kotay S, Chai W, Guilford W, Barry K, Mathers AJ. 2017. Spread from the Sink to the  
543 Patient: in situ Study Using Green Fluorescent Protein (GFP) Expressing- *Escherichia*  
544 *coli* to Model Bacterial Dispersion from Hand Washing Sink Trap Reservoirs. *Appl*  
545 *Environ Microbiol*.
- 546 35. Schneider H, Geginat G, Hogardt M, Kramer A, Durken M, Schrotten H, Tenenbaum T.  
547 2012. *Pseudomonas aeruginosa* outbreak in a pediatric oncology care unit caused by an  
548 errant water jet into contaminated siphons. *Pediatr Infect Dis J* 31:648-50.

- 549 36. Fusch C, Pogorzelski D, Main C, Meyer C, el Helou S, Mertz D. 2015. Self-disinfecting  
550 sink drains reduce the *Pseudomonas aeruginosa* bioburden in a neonatal intensive care  
551 unit. *Acta Paediatrica* 104:e344-e349.
- 552 37. Pitten FA, Panzig B, Schröder G, Tietze K, Kramer A. 2001. Transmission of a  
553 multiresistant *Pseudomonas aeruginosa* strain at a German University Hospital. *Journal*  
554 *of Hospital Infection* 47:125-130.
- 555 38. Siegel JD, Rhinehart E, Jackson M, Chiarello L. 2007. 2007 Guideline for Isolation  
556 Precautions: Preventing Transmission of Infectious Agents in Health Care Settings. *Am J*  
557 *Infect Control* 35:S65-164.
- 558 39. WHO. 2014. Infection prevention and control of epidemic- and pandemic-prone acute  
559 respiratory infections in health care: WHO Guidelines. World Health Organization,  
560 Geneva.  
561 [http://apps.who.int/iris/bitstream/10665/112656/1/9789241507134\\_eng.pdf?ua=1](http://apps.who.int/iris/bitstream/10665/112656/1/9789241507134_eng.pdf?ua=1).
- 562 40. Kramer A, Daeschlein G, Niesytto C, Sissoko B, Sütterlin R, Blaschke M, Fusch C. 2005.  
563 Contamination of sinks and emission of nosocomial gram negative pathogens in a NICU  
564 - outing of a reservoir as risk factor for nosocomial colonization and  
565 infection *Umweltmed Forsch Prax* 10.
- 566 41. Doring G, Horz M, Ortelt J, Grupp H, Wolz C. 1993. Molecular epidemiology of  
567 *Pseudomonas aeruginosa* in an intensive care unit. *Epidemiol Infect* 110:427-36.
- 568 42. Zemouri C, de Soet H, Crielaard W, Laheij A. 2017. A scoping review on bio-aerosols in  
569 healthcare and the dental environment. *Plos One* 12.
- 570 43. Haig C, Mackay W, Walker J, Williams C. 2016. Bioaerosol sampling: sampling  
571 mechanisms, bioefficiency and field studies. *Journal of Hospital Infection* 93:242-255.

- 572 44. Morawska L. 2006. Droplet fate in indoor environments, or can we prevent the spread of  
573 infection? *Indoor Air* 16:335-347.
- 574 45. Eames I, Shoaib D, Klettner C, Taban V. 2009. Movement of airborne contaminants in a  
575 hospital isolation room. *Journal of the Royal Society Interface* 6:S757-S766.
- 576 46. Stetzenbach L. 2002. Introduction to aerobiology. *In* Hurst C, Crawford R, Knudsen G,  
577 McInerney M, Stetzenbach L (ed), *Manual of environmental microbiology*, 2nd ed. ASM  
578 Press, Washington, DC.
- 579 47. Mohr A. 2002. Fate and transport of microorganisms in the air, p 827 – 838. *In* Hurst C,  
580 Crawford R, Knudsen G, McInerney M, Stetzenbach L (ed), *Manual of Environmental*  
581 *Microbiology*, 2nd ed. ASM Press, Washington, DC.

582

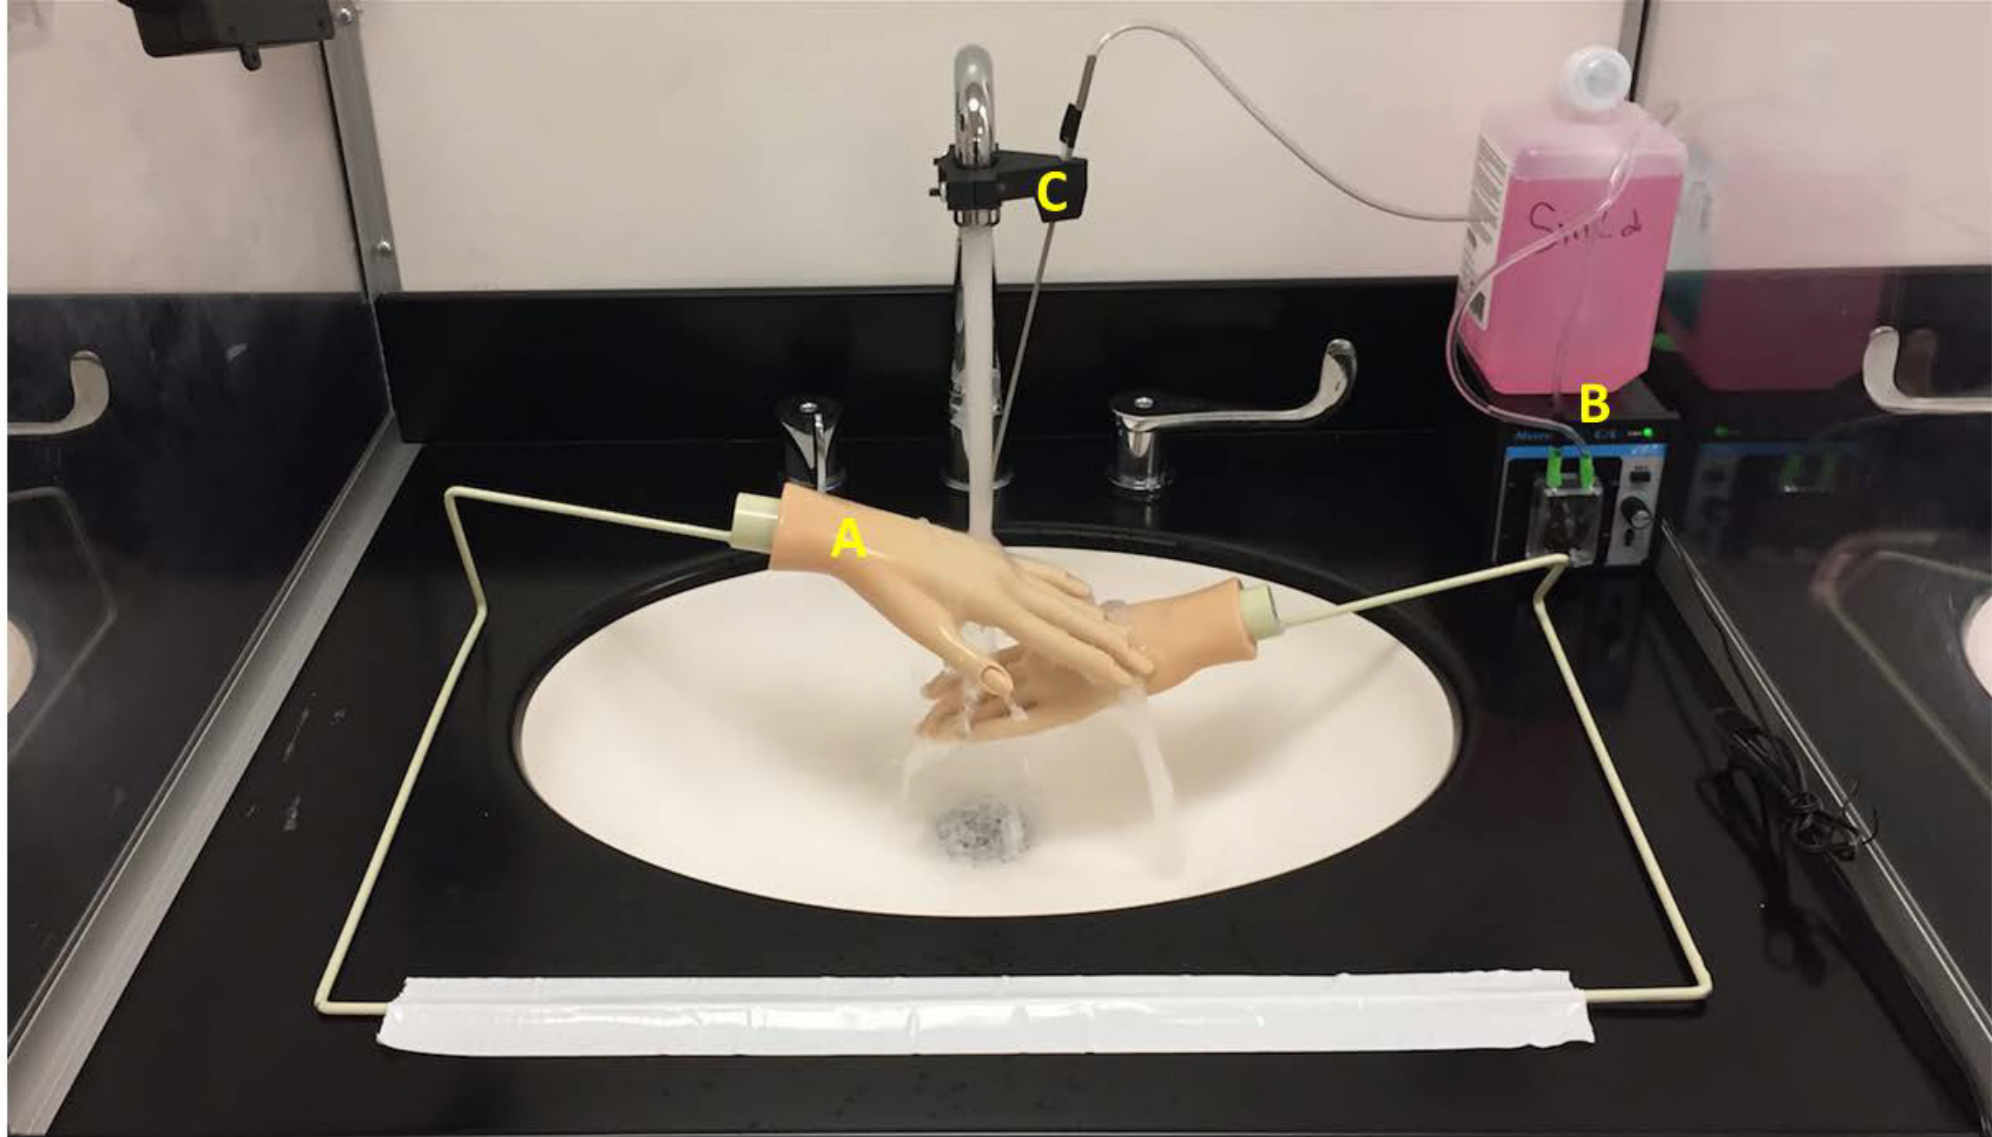

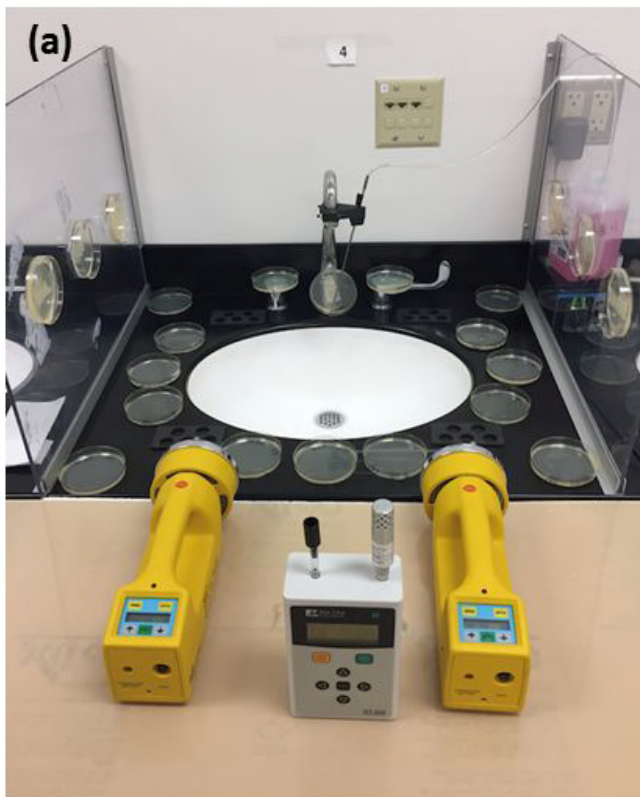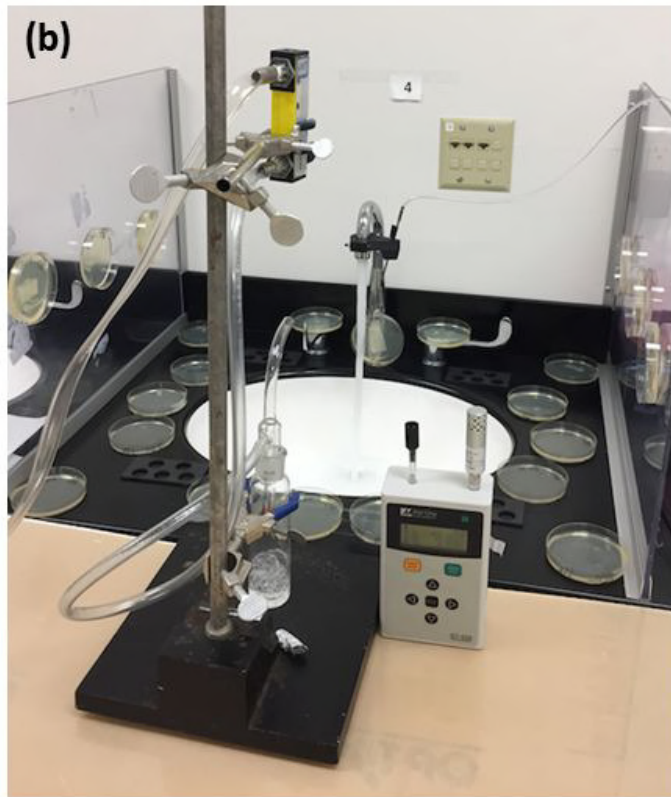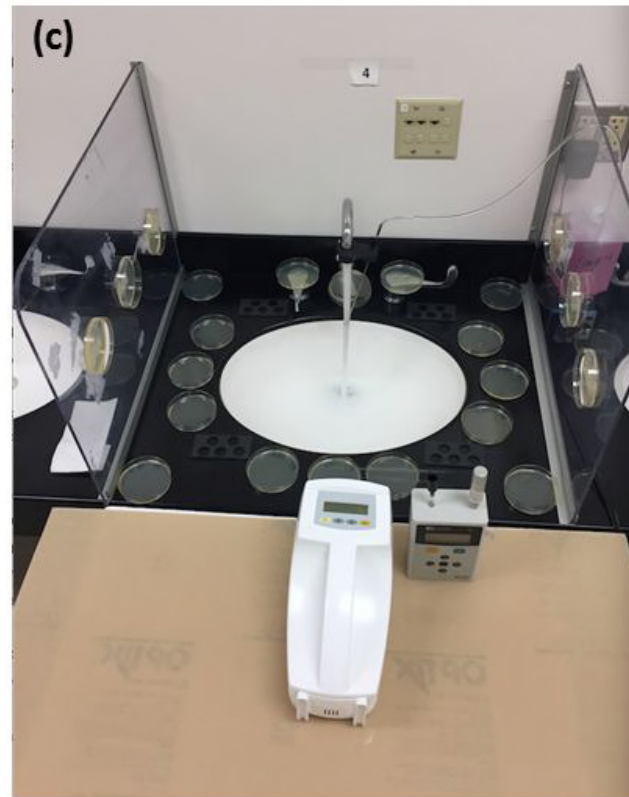

**CONTROL**

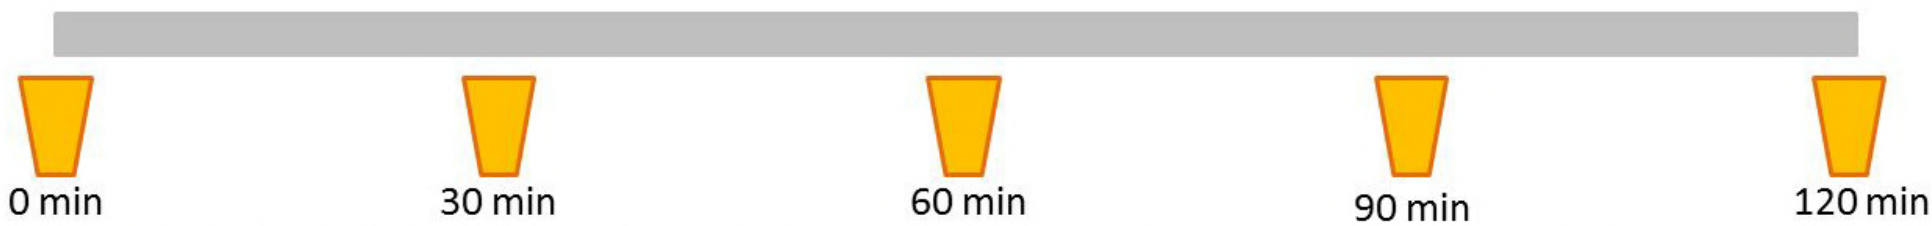

**TEST**

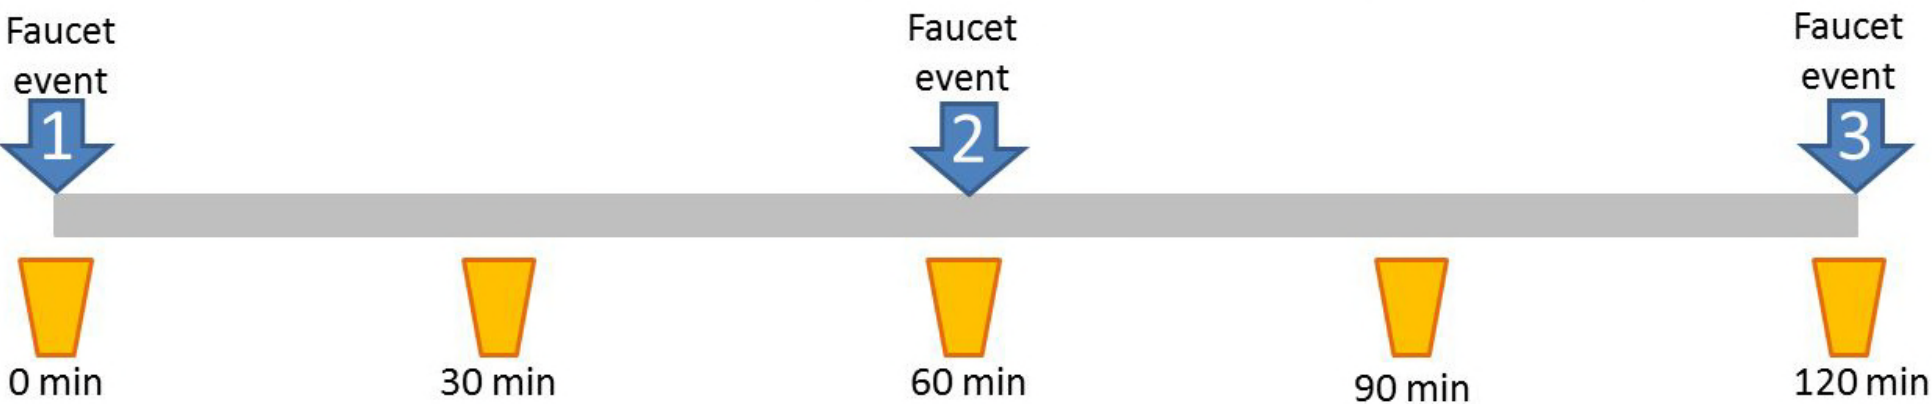

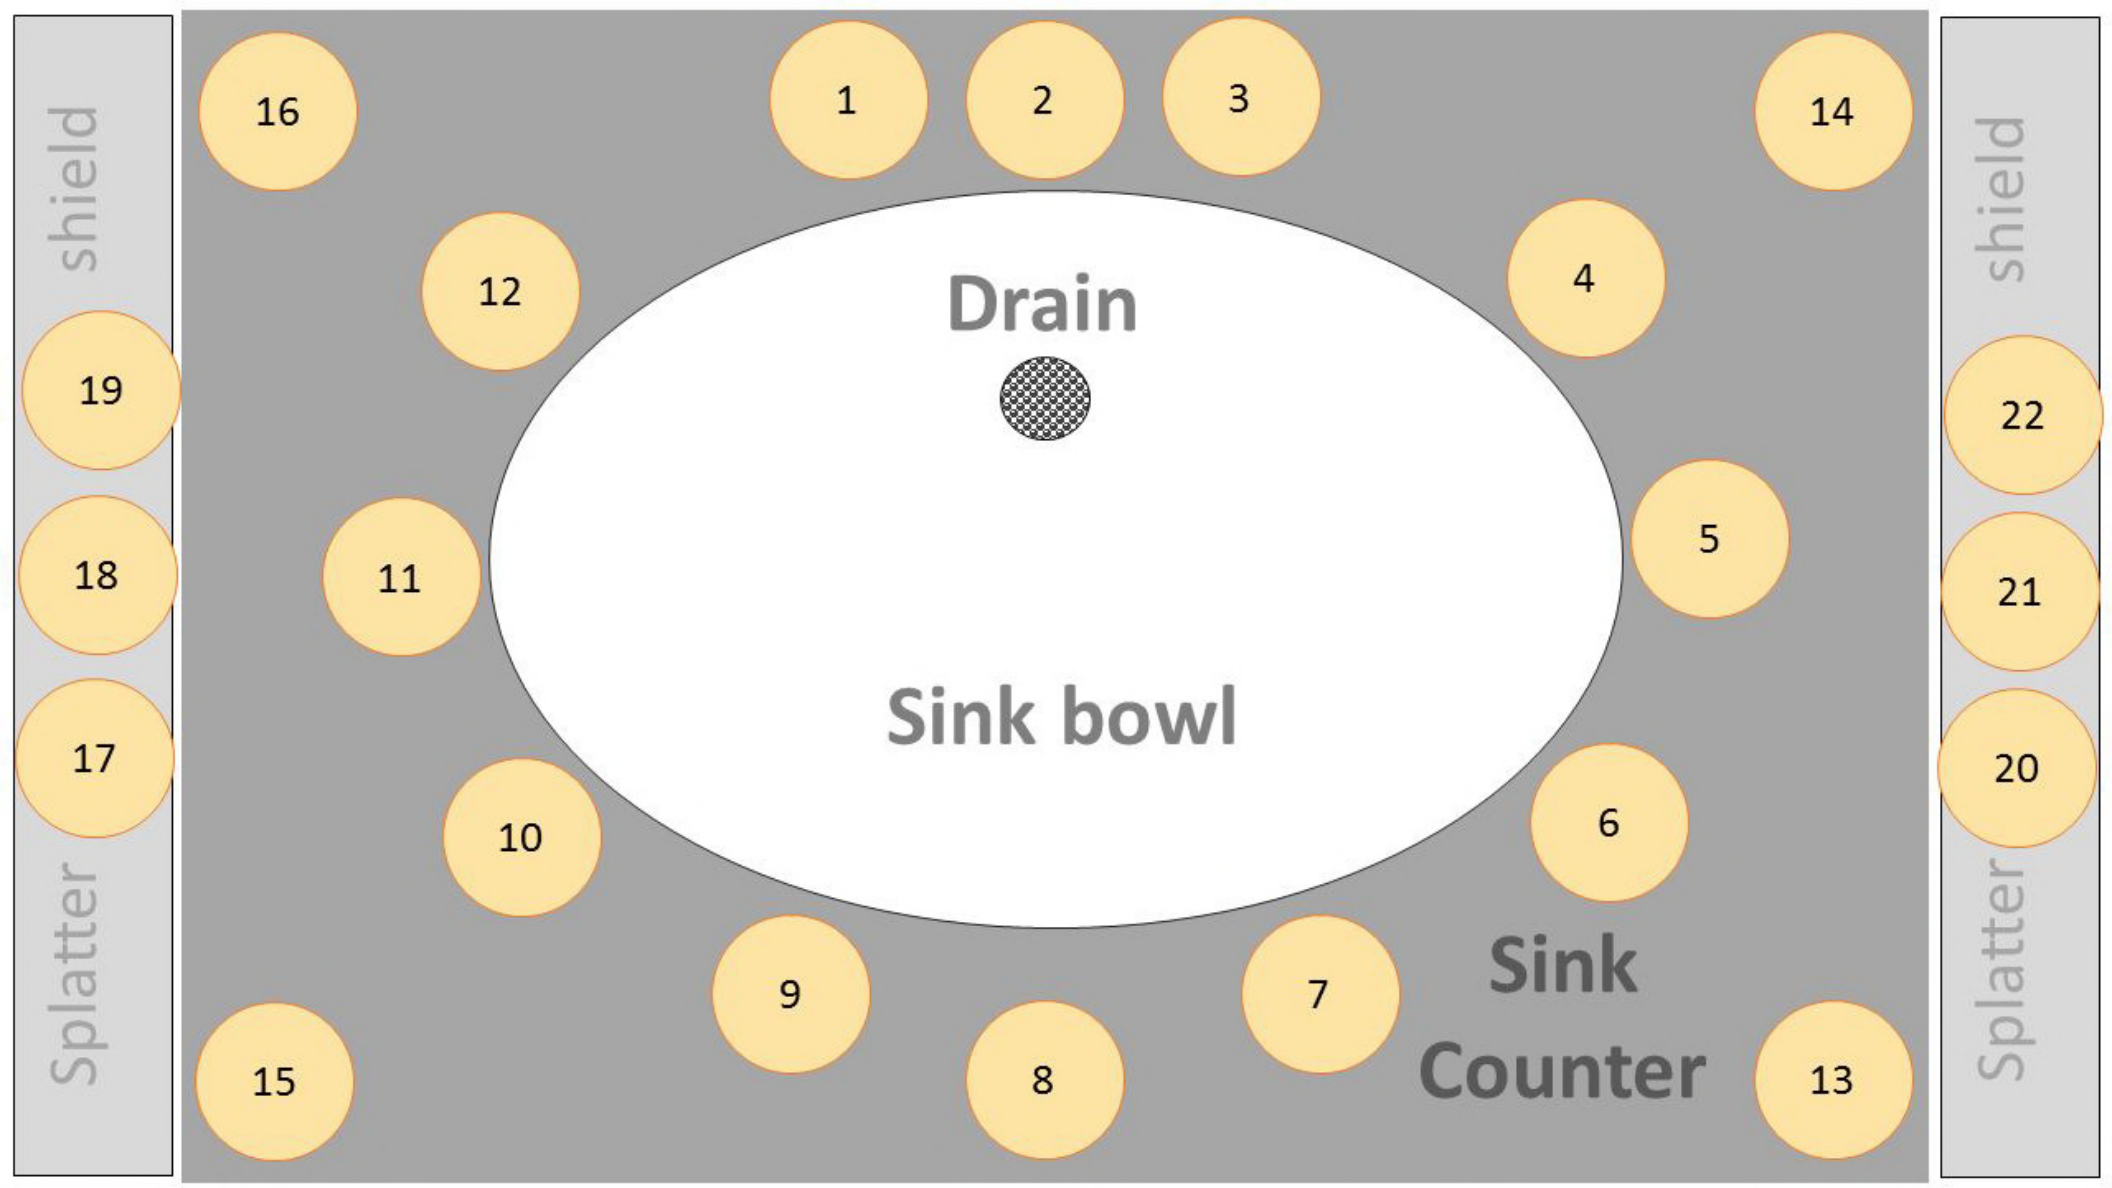

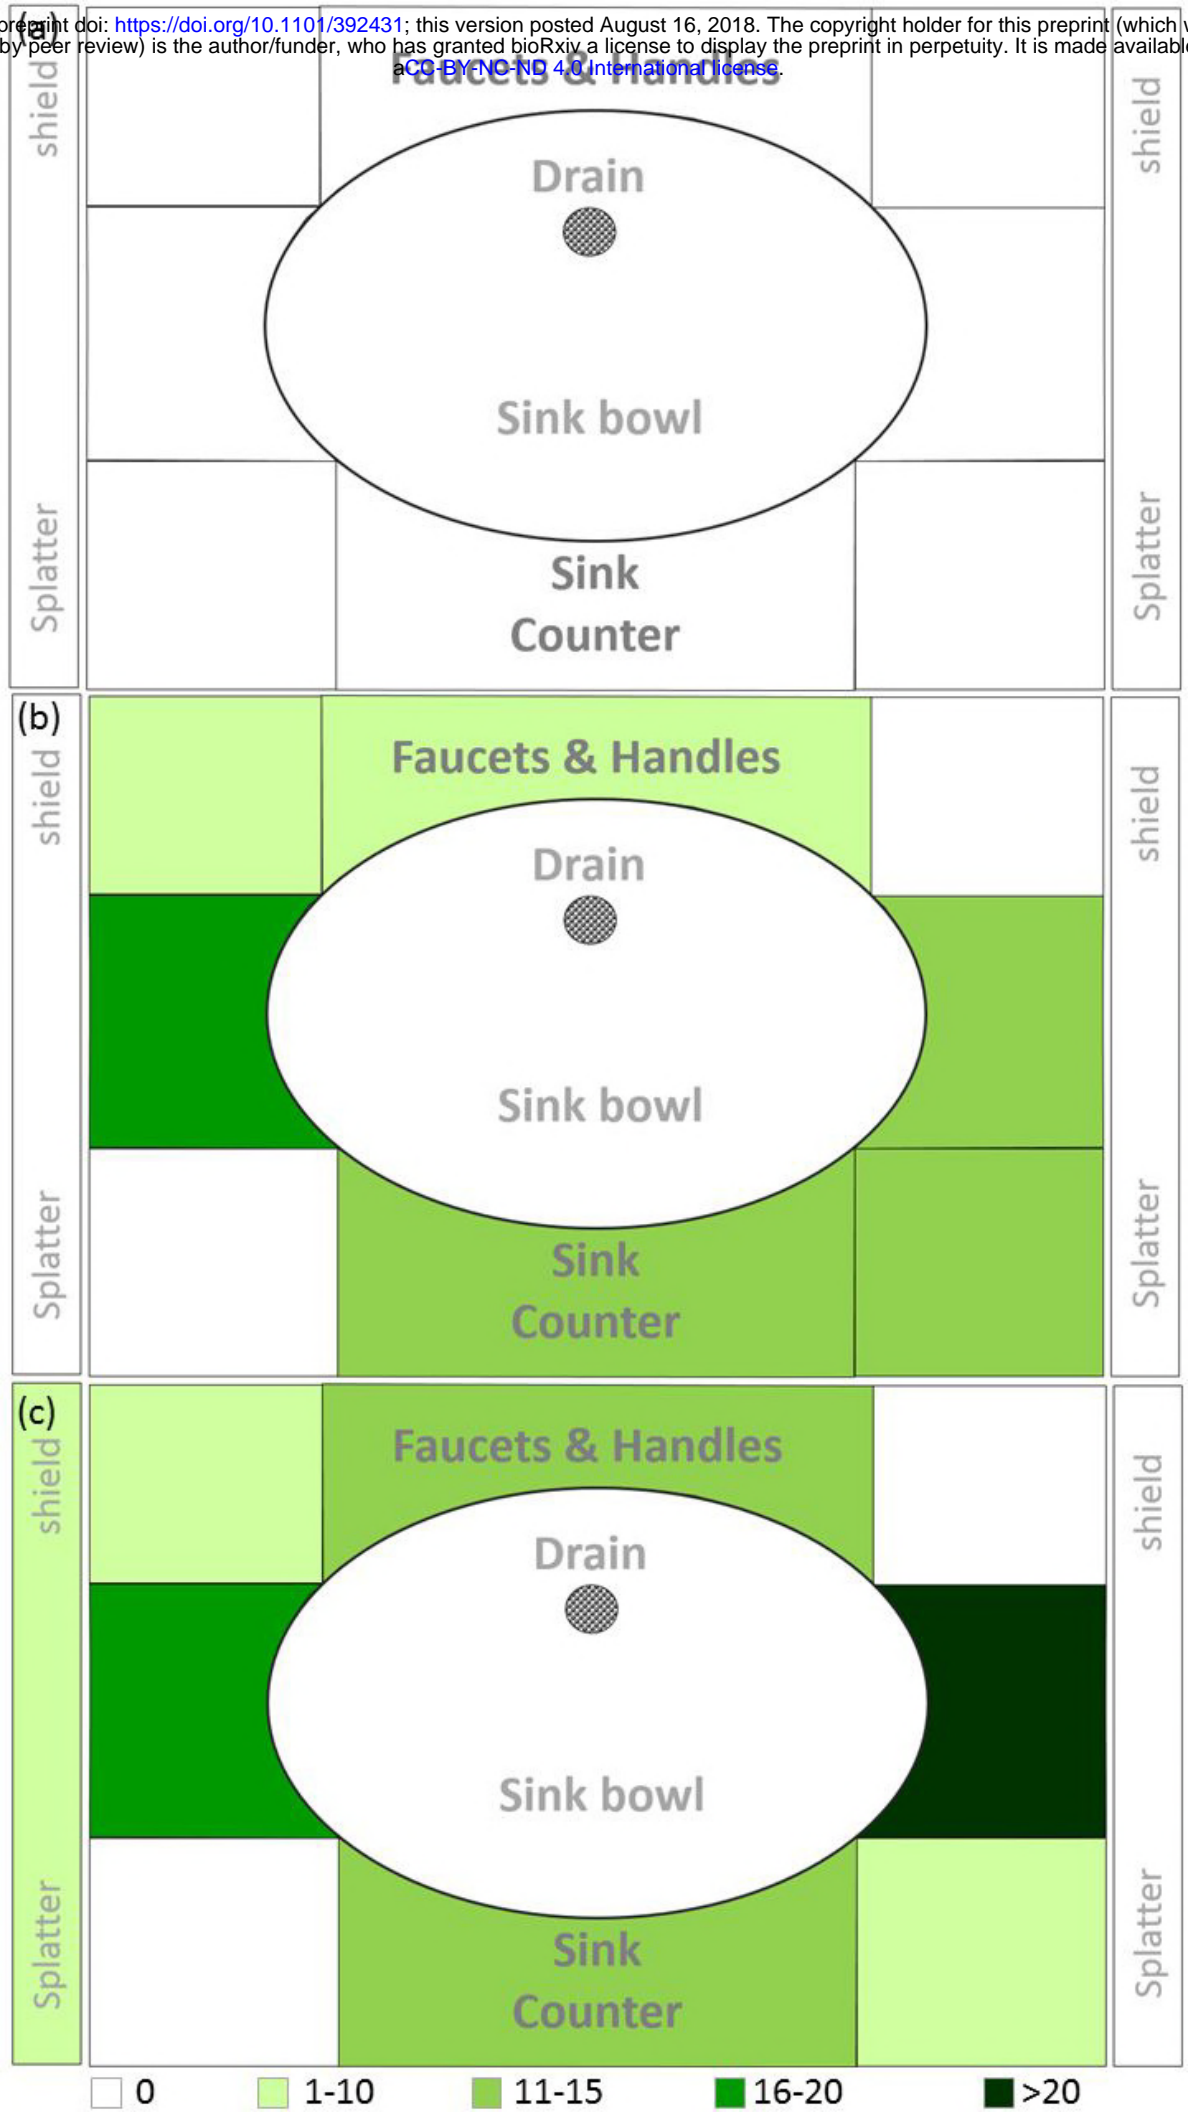

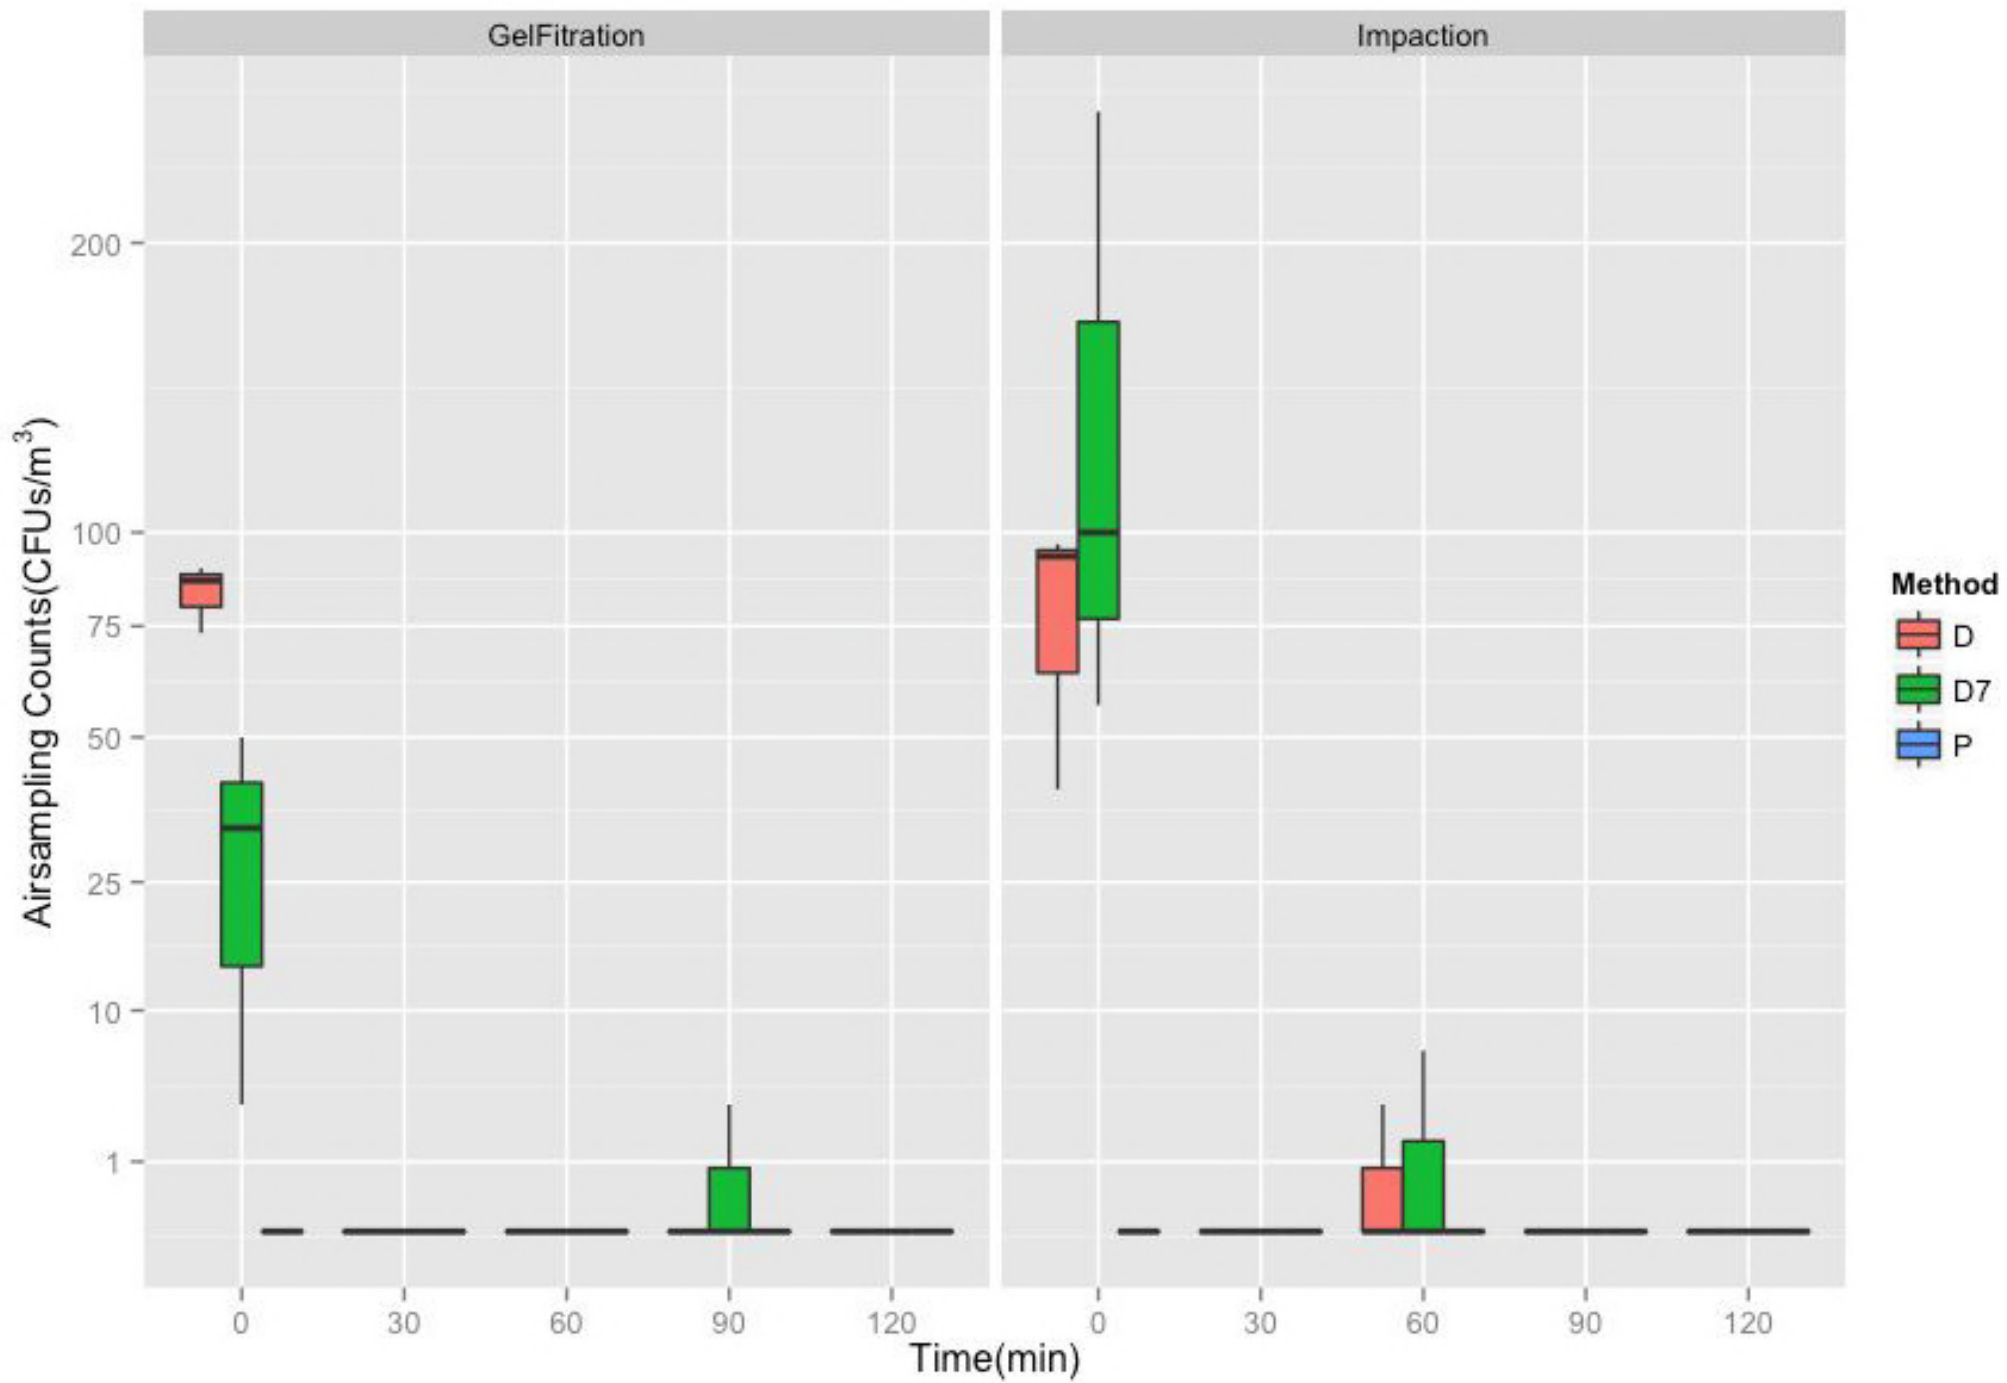



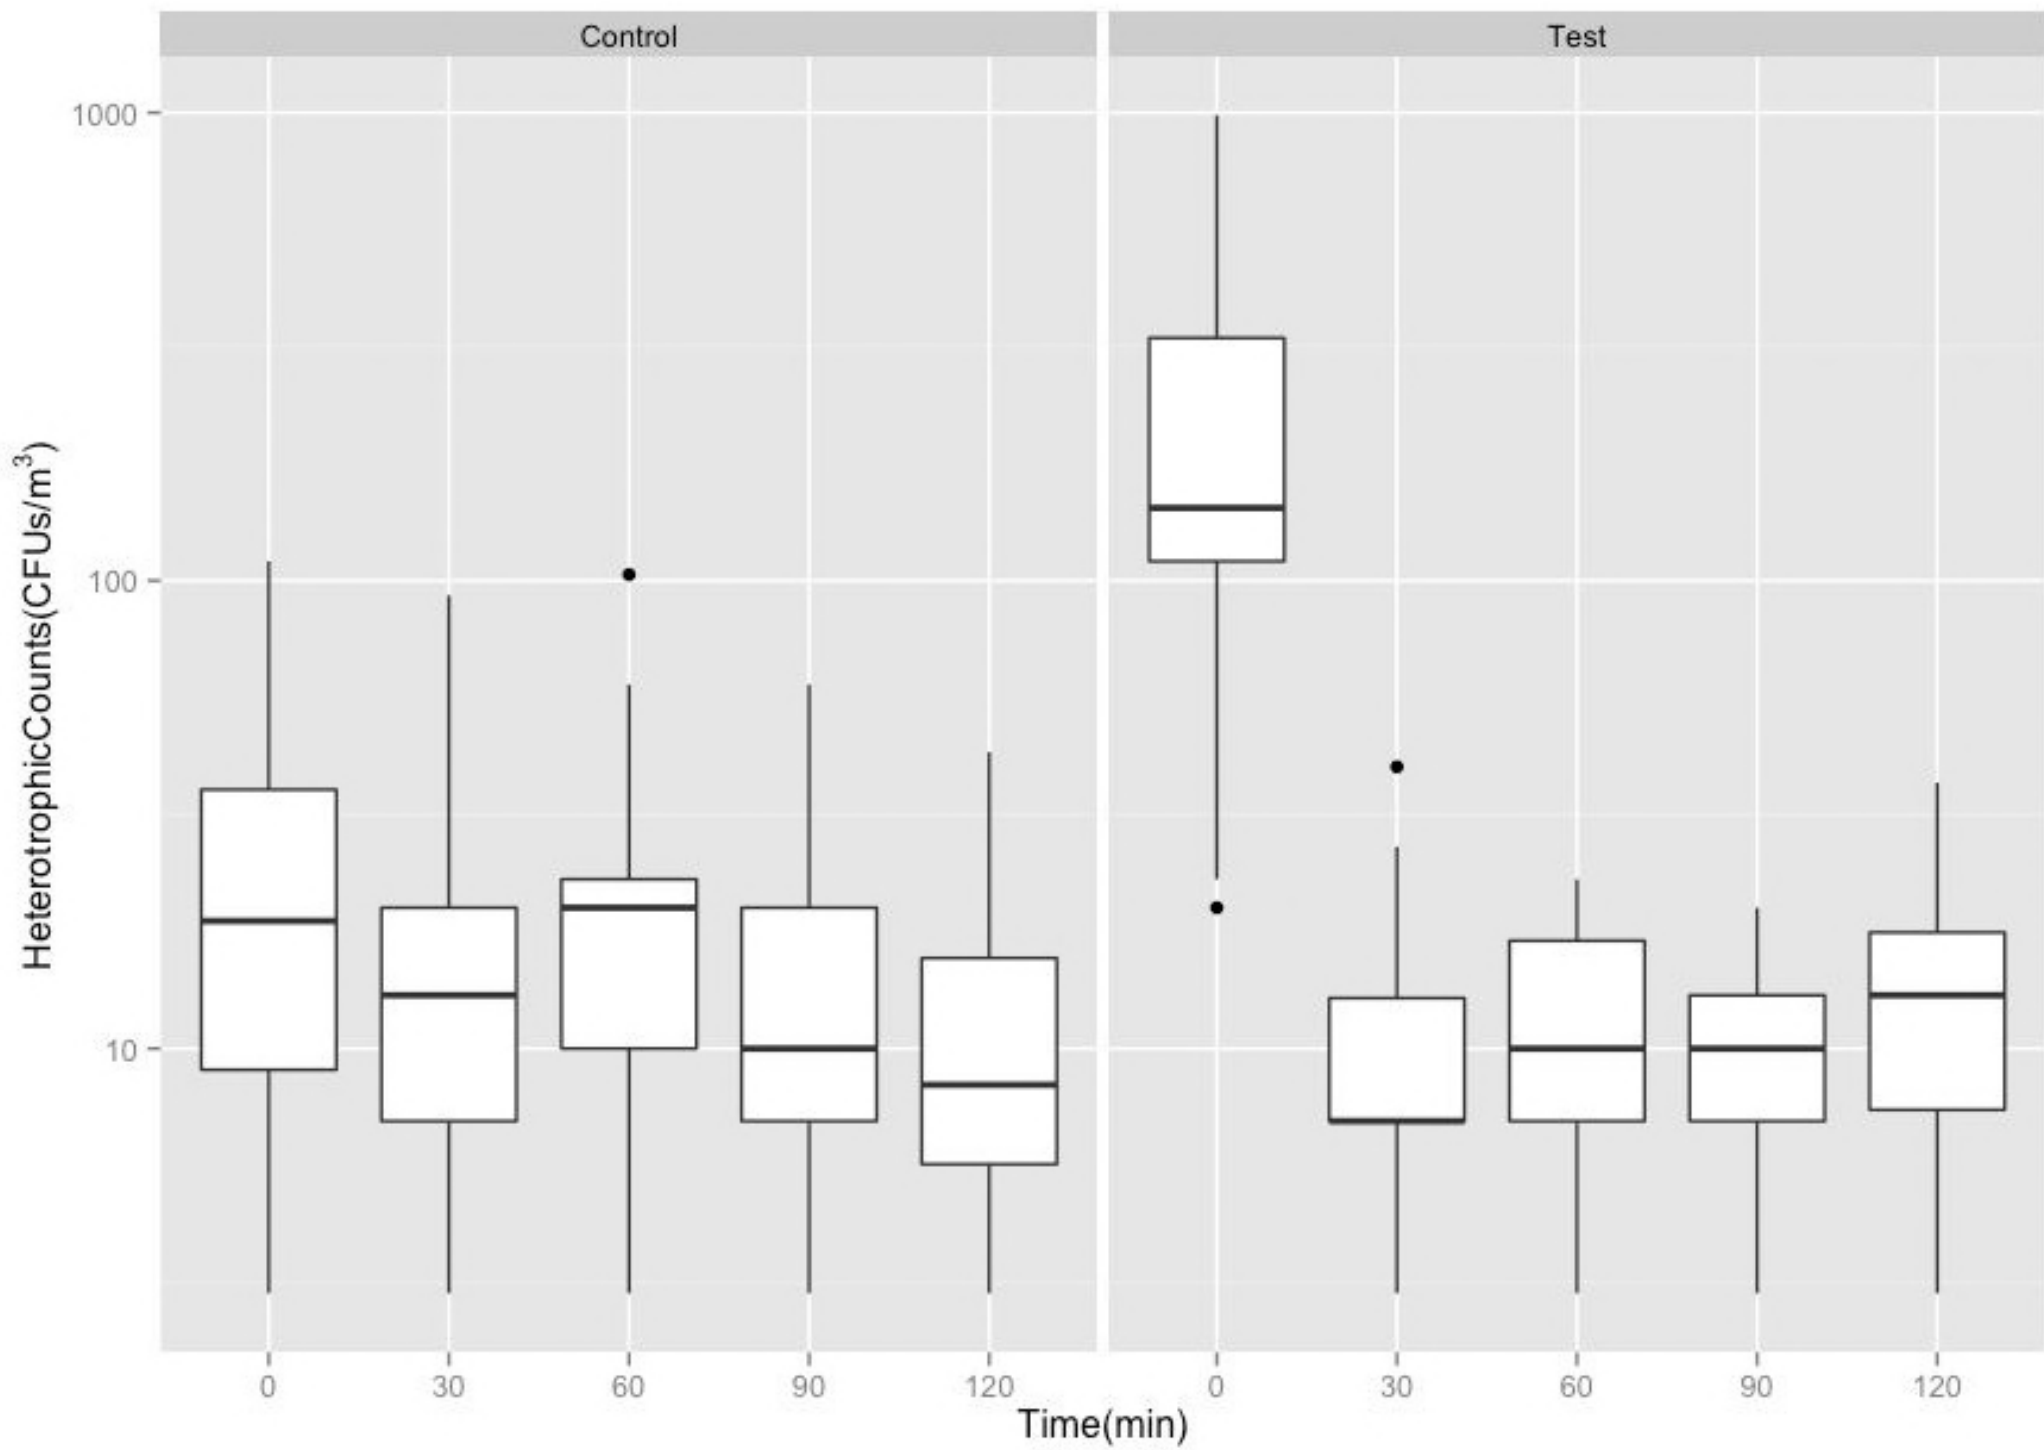

Source: https://www.biorxiv.org/content/10.1101/392431v1.full.pdf
